# Supplementary material for: Evaluating the technical use of a Fitbit during an intervention for patients with pulmonary arterial hypertension with quality of life as primary endpoint: Lessons learned from the UPHILL study
Source: PubMed Central journal article supplement — Pulm Circ. 2024 Jun 14;14(2):e12381. doi: 10.1002/pul2.12381 (PMC11177024; doi:10.1002/pul2.12381), 2024-06-14
Supplement: PUL2-14-e12381-s001.pdf [file PUL2-14-e12381-s001.pdf]

## De CBS-versie van de SQUASH

Neem in uw gedachten een normale week in de afgelopen maanden.

Wilt u aangeven hoeveel dagen per week u de onderstaande activiteiten verrichtte, hoeveel tijd u daar gemiddeld op zo'n dag mee bezig was en hoe inspannend deze activiteiten waren?

### Woon/werkverkeer (heen en terug)

|                                       | aantal dagen<br>per week |       | gemiddelde tijd<br>per dag                |                                               | inspanning                                     |                                                                                                          |
|---------------------------------------|--------------------------|-------|-------------------------------------------|-----------------------------------------------|------------------------------------------------|----------------------------------------------------------------------------------------------------------|
| a. lopen van/naar het werk of school  | <input type="text"/>     | dagen | <input type="text"/> <input type="text"/> | uur <input type="text"/> <input type="text"/> | min. <input type="text"/> <input type="text"/> | <input type="checkbox"/> langzaam<br><input type="checkbox"/> gemiddeld<br><input type="checkbox"/> snel |
| b. fietsen van/nar het werk of school | <input type="text"/>     | dagen | <input type="text"/> <input type="text"/> | uur <input type="text"/> <input type="text"/> | min. <input type="text"/> <input type="text"/> | <input type="checkbox"/> langzaam<br><input type="checkbox"/> gemiddeld<br><input type="checkbox"/> snel |
| c. niet van toepassing                | <input type="checkbox"/> |       |                                           |                                               |                                                |                                                                                                          |

### Lichamelijke activiteit op werk of school

|                                                                                                                                    | aantal uren<br>per week                       |
|------------------------------------------------------------------------------------------------------------------------------------|-----------------------------------------------|
| a. licht en matig inspannend werk<br>(zittend/staand werk, met af en toe lopen, zoals bureauwerk of lopend werk met lichte lasten) | <input type="text"/> <input type="text"/> uur |
| b. zwaar inspannend werk<br>(lopend werk of werk waarbij regelmatig zware dingen moeten worden opgetild)                           | <input type="text"/> <input type="text"/> uur |
| c. niet van toepassing                                                                                                             | <input type="checkbox"/>                      |

### Huishoudelijke activiteiten

|                                                                                                                                                                                      | aantal dagen<br>per week |       | gemiddelde tijd<br>per dag                |                                                    |
|--------------------------------------------------------------------------------------------------------------------------------------------------------------------------------------|--------------------------|-------|-------------------------------------------|----------------------------------------------------|
| a. licht en matig inspannend huishoudelijk werk<br>(staand werk, zoals koken, afwassen, strijken, kind eten geven / in bad doen en lopend werk, zoals stofzuigen, boodschappen doen) | <input type="text"/>     | dagen | <input type="text"/> <input type="text"/> | uur <input type="text"/> <input type="text"/> min. |
| b. zwaar inspannend huishoudelijk werk<br>(vloer schrobben, tapijt uitkloppen, met zware boodschappen lopen)                                                                         | <input type="text"/>     | dagen | <input type="text"/> <input type="text"/> | uur <input type="text"/> <input type="text"/> min. |

---

c. niet van toepassing

**Vrije tijd**

**aantal dagen  
per week**

**gemiddelde tijd  
per dag**

**inspanning**

a. wandelen

dagen

uur

min.

langzaam

gemiddeld

snel

---

b. fietsen

dagen

uur

min.

langzaam

gemiddeld

snel

---

c. tuinieren

dagen

uur

min.

langzaam

gemiddeld

snel

---

d. klussen/doe-het-zelfen

dagen

uur

min.

langzaam

gemiddeld

snel

---

**Sport** (hier maximaal 4 sporten opschrijven)

Bijv. tennis, handbal, gymnastiek, fitness, schaatsen, zwemmen

|    |                      | aantal dagen<br>per week |       | gemiddelde tijd<br>per dag                |     |                                           | inspanning |                                                                                                          |
|----|----------------------|--------------------------|-------|-------------------------------------------|-----|-------------------------------------------|------------|----------------------------------------------------------------------------------------------------------|
| a. | <input type="text"/> | <input type="text"/>     | dagen | <input type="text"/> <input type="text"/> | uur | <input type="text"/> <input type="text"/> | min.       | <input type="checkbox"/> langzaam<br><input type="checkbox"/> gemiddeld<br><input type="checkbox"/> snel |

---

|    |                      |                      |       |                                           |     |                                           |      |                                                                                                          |
|----|----------------------|----------------------|-------|-------------------------------------------|-----|-------------------------------------------|------|----------------------------------------------------------------------------------------------------------|
| b. | <input type="text"/> | <input type="text"/> | dagen | <input type="text"/> <input type="text"/> | uur | <input type="text"/> <input type="text"/> | min. | <input type="checkbox"/> langzaam<br><input type="checkbox"/> gemiddeld<br><input type="checkbox"/> snel |
|----|----------------------|----------------------|-------|-------------------------------------------|-----|-------------------------------------------|------|----------------------------------------------------------------------------------------------------------|

---

|    |                      |                      |       |                                           |     |                                           |      |                                                                                                          |
|----|----------------------|----------------------|-------|-------------------------------------------|-----|-------------------------------------------|------|----------------------------------------------------------------------------------------------------------|
| c. | <input type="text"/> | <input type="text"/> | dagen | <input type="text"/> <input type="text"/> | uur | <input type="text"/> <input type="text"/> | min. | <input type="checkbox"/> langzaam<br><input type="checkbox"/> gemiddeld<br><input type="checkbox"/> snel |
|----|----------------------|----------------------|-------|-------------------------------------------|-----|-------------------------------------------|------|----------------------------------------------------------------------------------------------------------|

---

|    |                      |                      |       |                                           |     |                                           |      |                                                                                                          |
|----|----------------------|----------------------|-------|-------------------------------------------|-----|-------------------------------------------|------|----------------------------------------------------------------------------------------------------------|
| d. | <input type="text"/> | <input type="text"/> | dagen | <input type="text"/> <input type="text"/> | uur | <input type="text"/> <input type="text"/> | min. | <input type="checkbox"/> langzaam<br><input type="checkbox"/> gemiddeld<br><input type="checkbox"/> snel |
|----|----------------------|----------------------|-------|-------------------------------------------|-----|-------------------------------------------|------|----------------------------------------------------------------------------------------------------------|

---

**Totaal**

Op gemiddelde hoeveel dagen per week bent u, allse bij elkaar opgeteld, tenminste en halfu ur bezig met fietsen, klussen, tuinieren of sporten of andere inspannedne activiteiten?

|                      |                |
|----------------------|----------------|
| <input type="text"/> | dagen per week |
|----------------------|----------------|

# De RIVM-versie van de SQUASH

Neem in uw gedachten een normale week in de afgelopen maanden. Wilt u aangeven **hoeveel dagen per week** u de onderstaande activiteiten verrichte, hoeveel minuten u daar dan **gemiddeld** op zo'n dag mee bezig was en hoe inspannend deze activiteit was?

| <b>WOON-WERK/SCHOOL VERKEER<br/>(heen en terug)</b>                                                                                                                          | <b>aantal dagen<br/>per week</b> | <b>gemiddelde tijd<br/>per dag</b>                                         | <b>inspanning<br/>(omcirkelen a.u.b.)</b>                                                       |
|------------------------------------------------------------------------------------------------------------------------------------------------------------------------------|----------------------------------|----------------------------------------------------------------------------|-------------------------------------------------------------------------------------------------|
| Lopen van/naar werk of school                                                                                                                                                | <input type="text"/> dagen       | <input type="text"/> uur <input type="text"/> <input type="text"/> minuten | langzaam/gemiddeld/snel                                                                         |
| Fietsen van/naar werk of school                                                                                                                                              | <input type="text"/> dagen       | <input type="text"/> uur <input type="text"/> <input type="text"/> minuten | langzaam/gemiddeld/snel                                                                         |
| Niet van toepassing                                                                                                                                                          | <input type="checkbox"/>         |                                                                            |                                                                                                 |
| <b>LICHAMELIJKE ACTIVITEIT OP WERK EN SCHOOL</b>                                                                                                                             |                                  |                                                                            | <b>gemiddelde tijd<br/>per week</b>                                                             |
| Licht en matig inspannend werk (zittend/staand werk, met af en toe lopen, zoals bureauwerk of lopend werk met lichte lasten)                                                 |                                  |                                                                            | <input type="text"/> <input type="text"/> uur <input type="text"/> <input type="text"/> minuten |
| Zwaar inspannend werk (lopend werk, waarbij regelmatig zware dingen moeten worden opgetild)                                                                                  |                                  |                                                                            | <input type="text"/> <input type="text"/> uur <input type="text"/> <input type="text"/> minuten |
| Niet van toepassing                                                                                                                                                          |                                  |                                                                            | <input type="checkbox"/>                                                                        |
| <b>HUISHOUDELIJKE ACTIVITEITEN</b>                                                                                                                                           |                                  | <b>aantal dagen<br/>per week</b>                                           | <b>gemiddelde tijd<br/>per dag</b>                                                              |
| Licht en matig inspannend huishoudelijk werk (staand werk, zoals koken, afwassen, strijken, kind eten geven/in bad doen en lopend werk, zoals stofzuigen, boodschappen doen) |                                  | <input type="text"/> dagen                                                 | <input type="text"/> uur <input type="text"/> <input type="text"/> minuten                      |
| Zwaar inspannend huishoudelijk werk (vloer schrobben, tapijt uitkloppen, met zware boodschappen lopen)                                                                       |                                  | <input type="text"/> dagen                                                 | <input type="text"/> uur <input type="text"/> <input type="text"/> minuten                      |
| Niet van toepassing                                                                                                                                                          |                                  | <input type="checkbox"/>                                                   |                                                                                                 |
| <b>VRIJE TIJD</b>                                                                                                                                                            | <b>aantal dagen<br/>per week</b> | <b>gemiddelde tijd<br/>per dag</b>                                         | <b>inspanning<br/>(omcirkel a.u.b.)</b>                                                         |
| Wandelen                                                                                                                                                                     | <input type="text"/> dagen       | <input type="text"/> uur <input type="text"/> <input type="text"/> minuten | Langzaam/gemiddeld/snel                                                                         |
| Fietsen                                                                                                                                                                      | <input type="text"/> dagen       | <input type="text"/> uur <input type="text"/> <input type="text"/> minuten | Langzaam/gemiddeld/snel                                                                         |
| Tuinieren                                                                                                                                                                    | <input type="text"/> dagen       | <input type="text"/> uur <input type="text"/> <input type="text"/> minuten | Licht/gemiddeld/zwaar                                                                           |
| Klussen/Doe-het-zelven                                                                                                                                                       | <input type="text"/> dagen       | <input type="text"/> uur <input type="text"/> <input type="text"/> minuten | Licht/gemiddeld/zwaar                                                                           |
| Sporten (Hier maximaal 4 opschrijven)<br><i>bijv.: tennis, handbal, gymnastiek, fitness, schaatsen, zwemmen</i>                                                              |                                  |                                                                            |                                                                                                 |
| 1. ....                                                                                                                                                                      | <input type="text"/> dagen       | <input type="text"/> uur <input type="text"/> <input type="text"/> minuten | Licht/gemiddeld/zwaar                                                                           |
| 2. ....                                                                                                                                                                      | <input type="text"/> dagen       | <input type="text"/> uur <input type="text"/> <input type="text"/> minuten | Licht/gemiddeld/zwaar                                                                           |
| 3. ....                                                                                                                                                                      | <input type="text"/> dagen       | <input type="text"/> uur <input type="text"/> <input type="text"/> minuten | licht/gemiddeld/zwaar                                                                           |
| 4. ....                                                                                                                                                                      | <input type="text"/> dagen       | <input type="text"/> uur <input type="text"/> <input type="text"/> minuten | licht/gemiddeld/zwaar                                                                           |
| <b>TOTAAL</b>                                                                                                                                                                |                                  |                                                                            |                                                                                                 |
| Op gemiddeld hoeveel dagen per week bent u, alles bijelkaar opgeteld, tenminste een half uur bezig met fietsen, klussen, tuinieren of sporten?                               |                                  |                                                                            | <input type="text"/> dagen per week                                                             |
